# Supplementary figures and images for: Four millennia of Iberian biomolecular prehistory illustrate the impact of prehistoric migrations at the far end of Eurasia
Source: PubMed Central journal article supplement — Proc Natl Acad Sci U S A. 2018 Mar 12;115(13):3428–33. doi: 10.1073/pnas.1717762115 (PMC5879675; doi:10.1073/pnas.1717762115), 2018-03-12

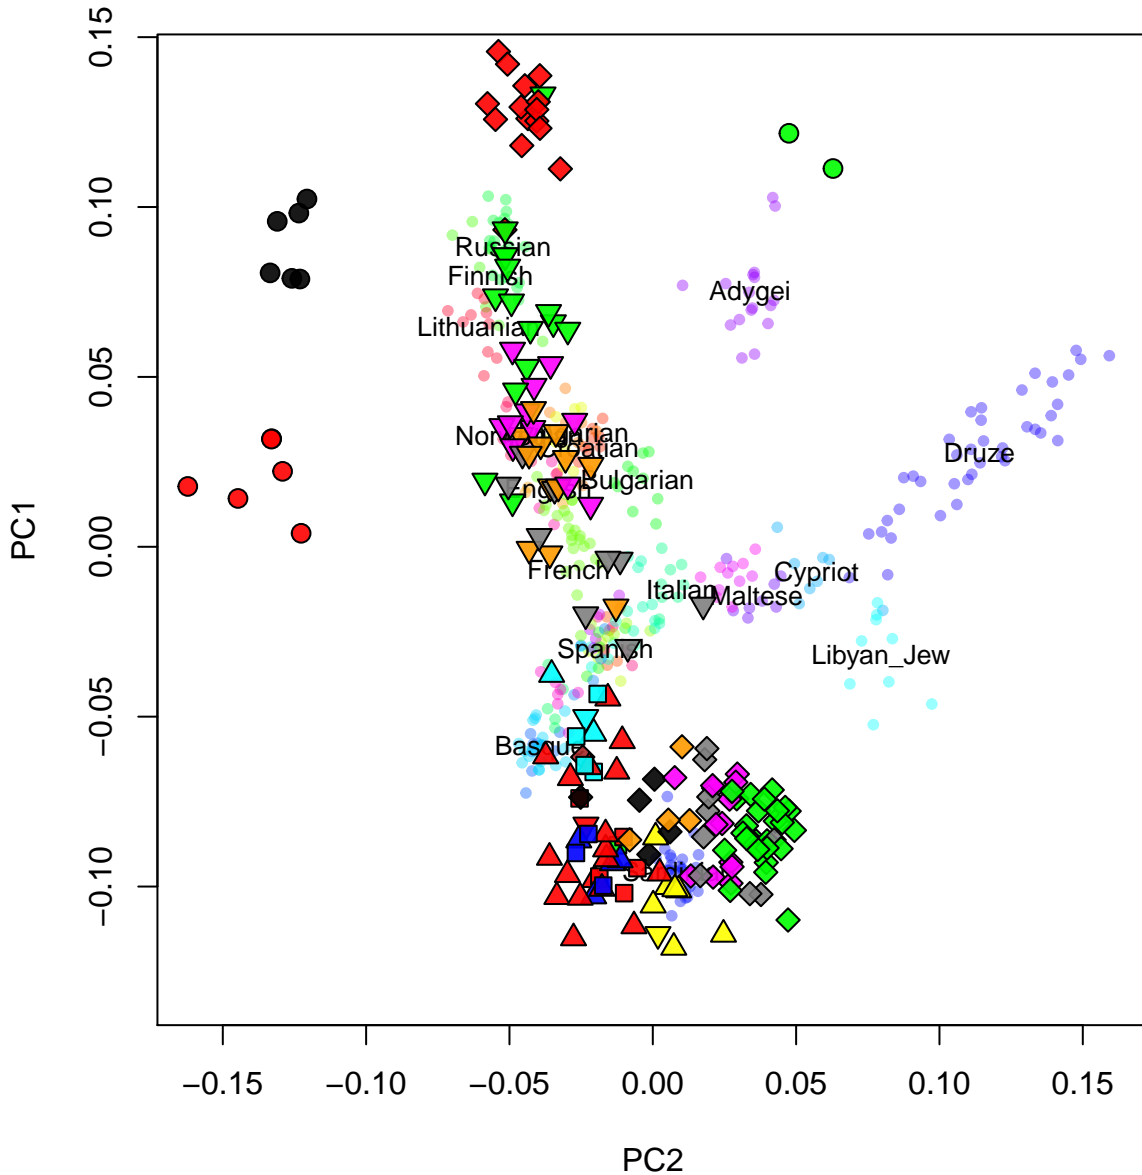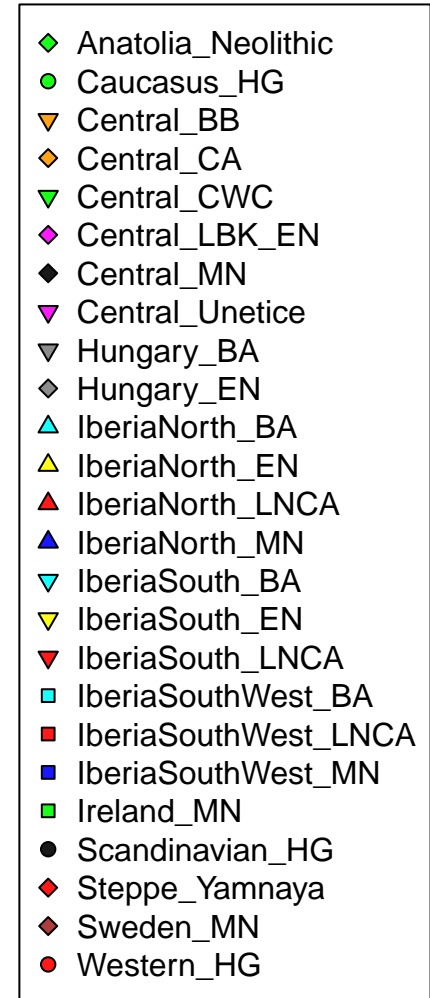

Supplement: pnas.1717762115.sd02.pdf [file pnas.1717762115.sd02.pdf]

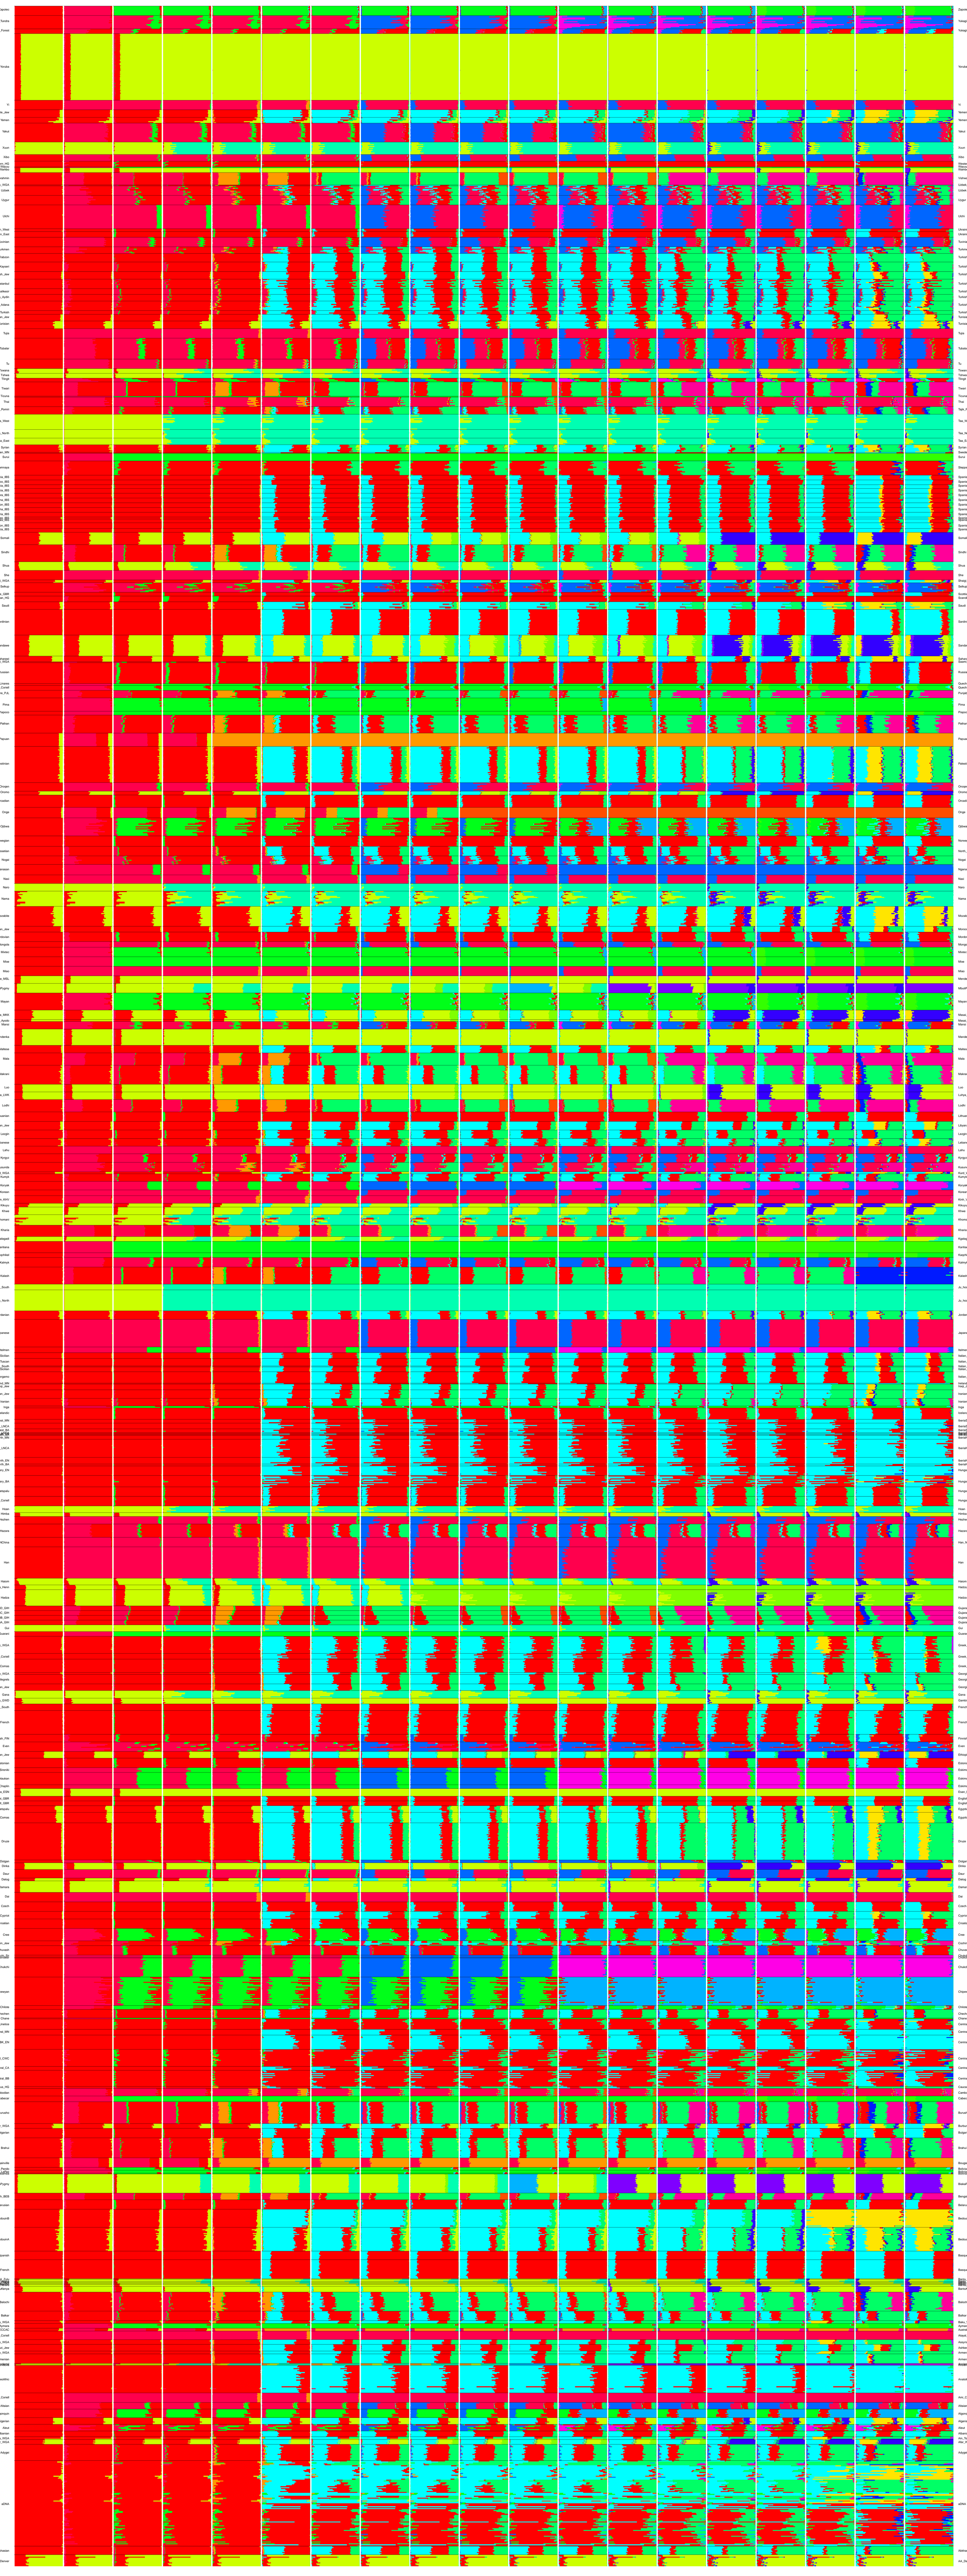

K=2 K=3 K=4 K=5 K=6 K=7 K=8 K=9 K=10 K=11 K=12 K=13 K=14 K=15 K=16 K=17 K=18 K=19 K=20

Supplement: pnas.1717762115.sd03.pdf [file pnas.1717762115.sd03.pdf]

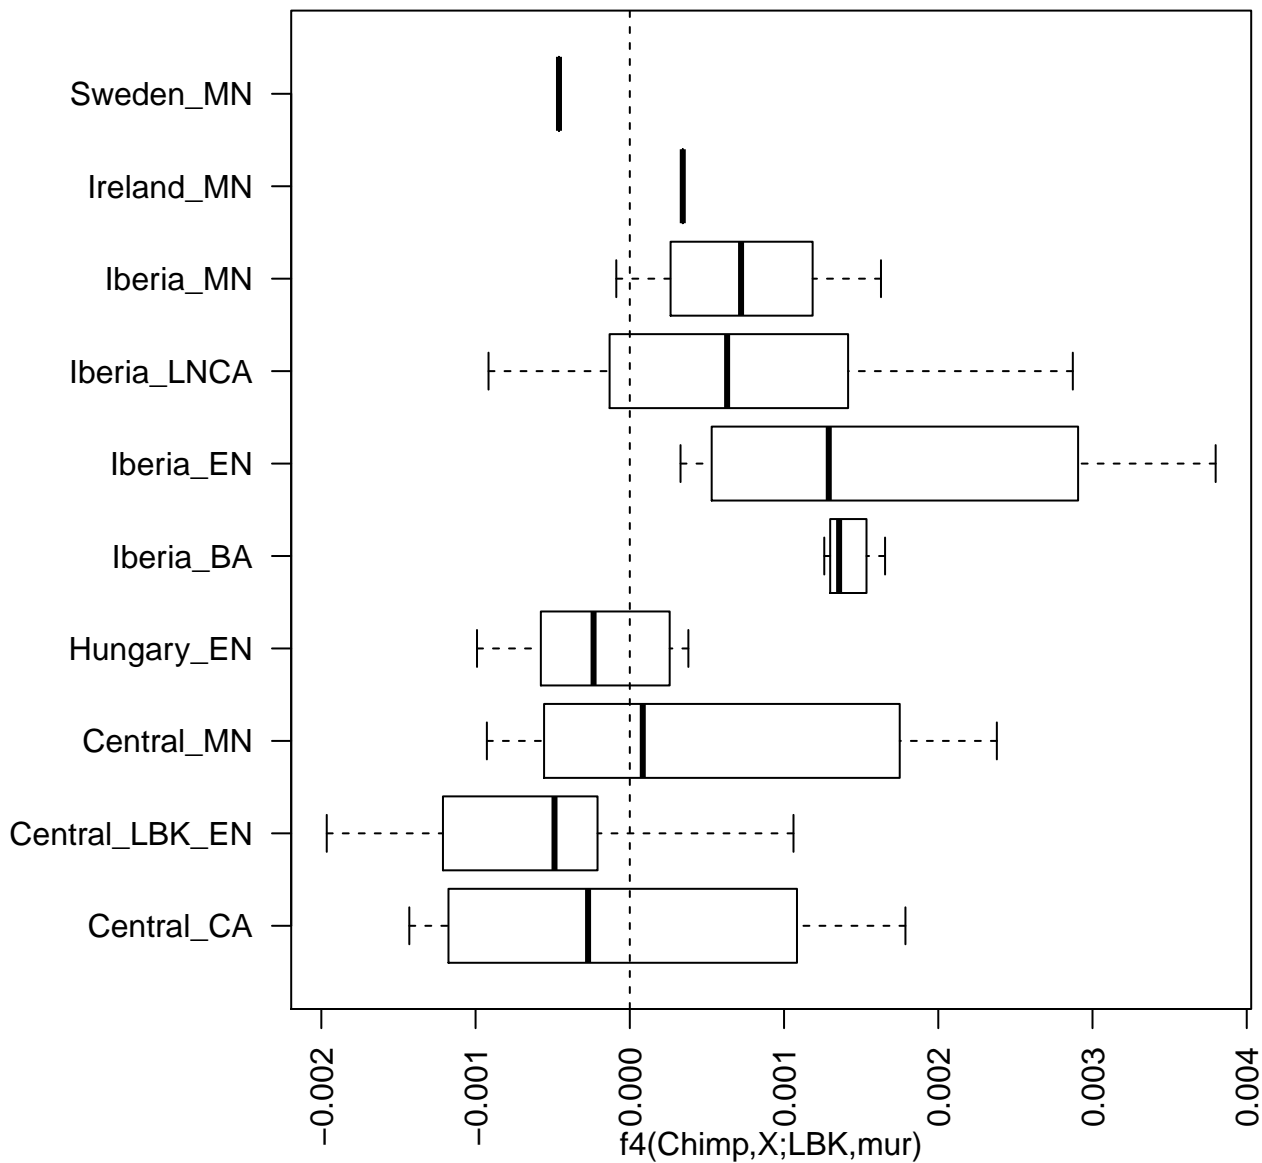

Supplement: pnas.1717762115.sd04.pdf [file pnas.1717762115.sd04.pdf]

**Early Neolithic, rho=0.52143; p=0.04883**

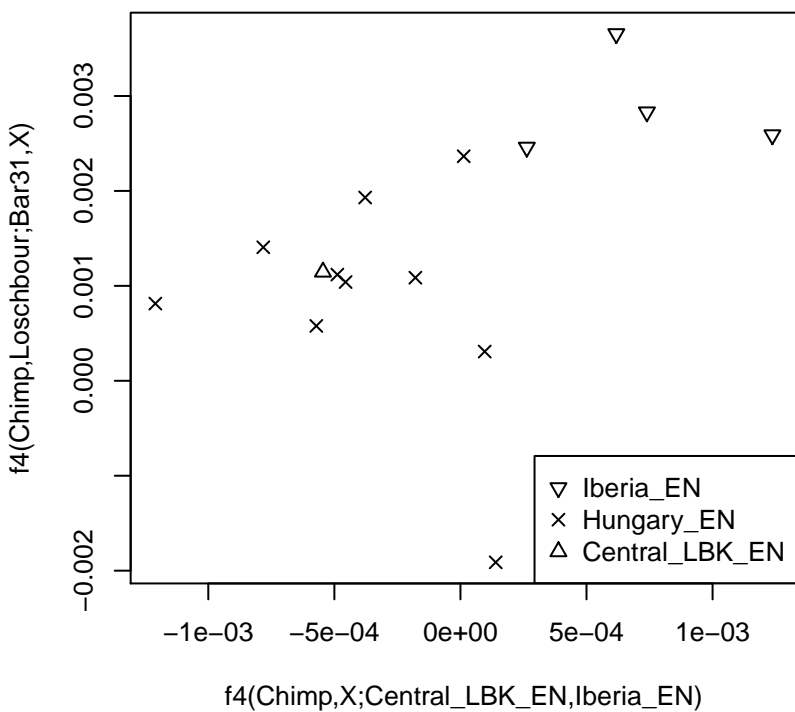

**Middle Neolithic, rho=0.4; p=0.12588**

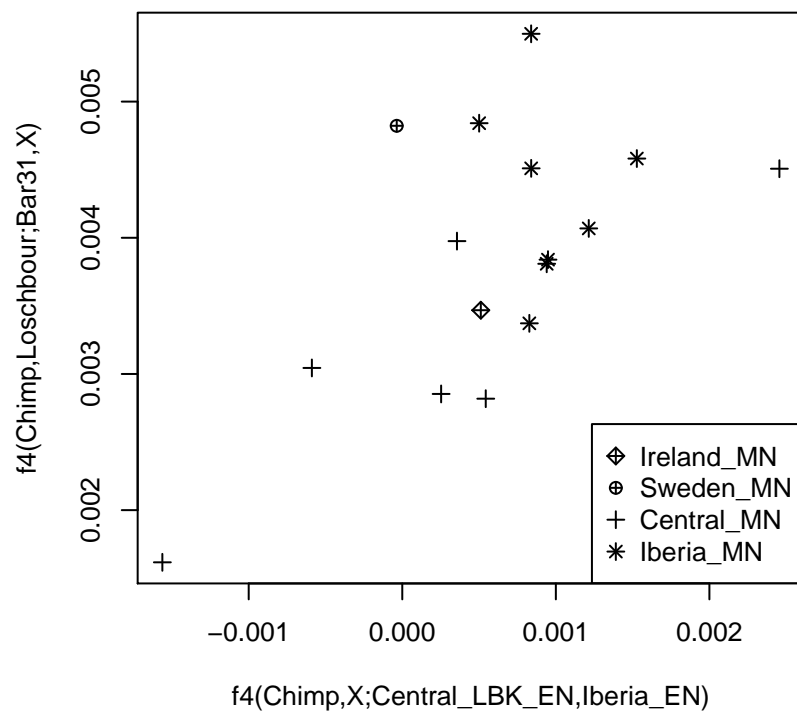

**Late Neolithic/Copper Age, rho=0.23382; p=0.21281**

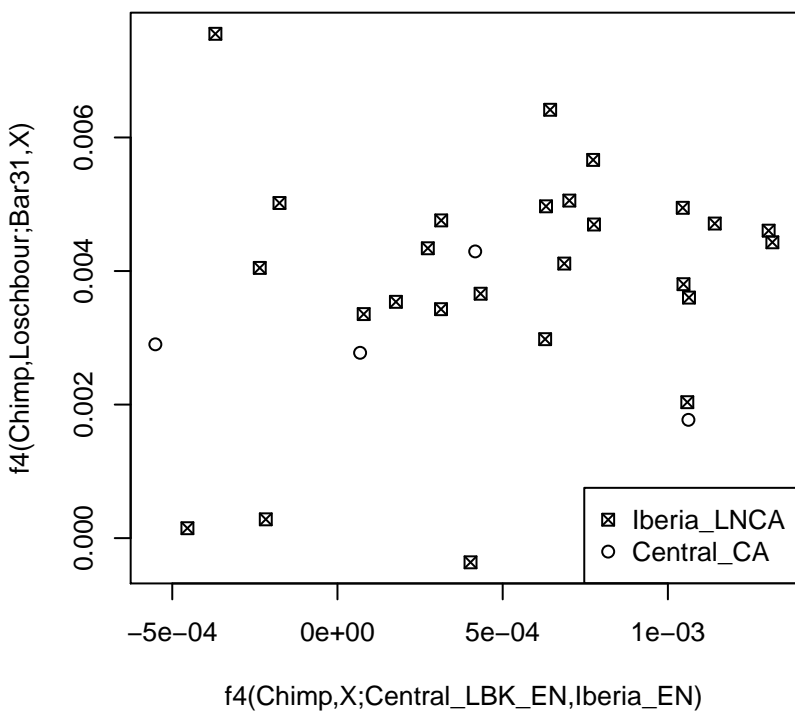

**Bronze Age, rho=-0.5; p=0.26667**

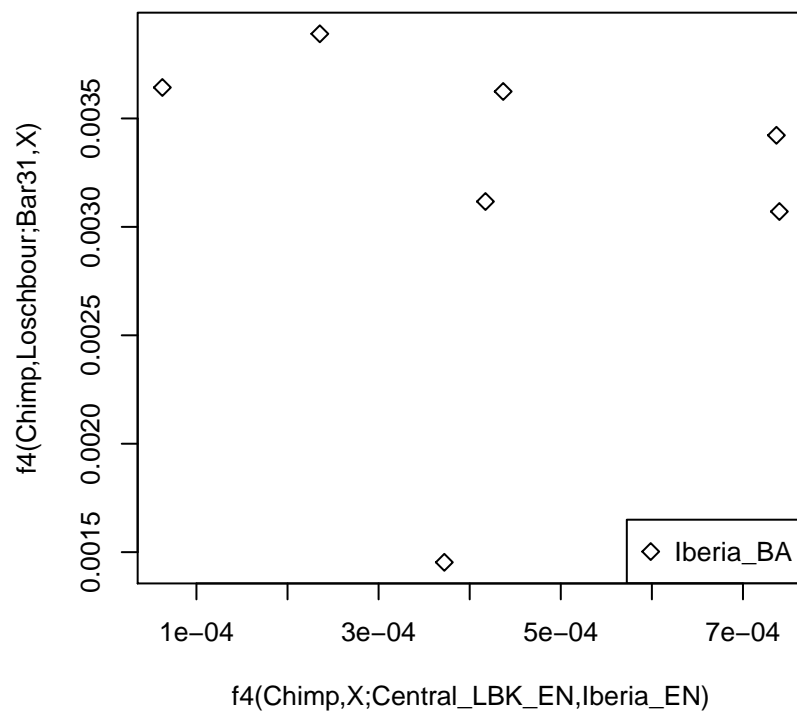

Supplement: pnas.1717762115.sd05.pdf [file pnas.1717762115.sd05.pdf]
